# Supplementary material
Source: PubMed Central journal article supplement (PMC8380733)
Supplement: NIHMS1718798-supplement-Supplemental_Tables.pdf [file NIHMS1718798-supplement-Supplemental_Tables.pdf]

**Supplementary Table 1: AML Patient Demographics**

| <b>Patient #</b> | <b>Age</b> | <b>Sex</b> | <b>Diagnosis/Relapse</b> | <b>Cytogenetics</b>     | <b>Mutations</b>             |
|------------------|------------|------------|--------------------------|-------------------------|------------------------------|
| Patient 1        | 65         | Male       | Relapse                  | Monosomy 7, Deletion 5q | ETV6, NRAS, SF3B1            |
| Patient 2        | 66         | Male       | Diagnosis                | Trisomy 8               | DNMT3A, FLT3-TKD, NPM1, IDH1 |
| Patient 3        | 67         | Male       | Relapse                  | Normal cytogenetics     | ASXL1, TET2, 2RSR2           |
| Patient 4        | 33         | Male       | Relapse                  | Deletion 12p            | None detected                |
| Patient 5        | 70         | Female     | Relapse                  | t(8,18), t(11,13)       | E2H2, TET2                   |

**Supplementary Table 2: Summary of targets identified in DARTS screen**

SC-Spectral count; LFQ-Label-free quantification; Proteins enriched atleast 2-fold with medium abundance (SC&gt;=10) are only shown.

| SC >= 10 medium abundance proteins |         |                                                    | LFQ intensity |           |           | Spectral Count |       |        |
|------------------------------------|---------|----------------------------------------------------|---------------|-----------|-----------|----------------|-------|--------|
| Accession                          | Gene ID | Protein Name                                       | MW [kDa]      | DMSO+     | S-250+    | 50+/DMS        | DMSO+ | S-250+ |
| Q01469                             | FABP5   | Fatty acid-binding protein, epidermal              | 15.16         | 146960000 | 336670000 | 2.29           | 51    | 77     |
| P37802                             | TAGL2   | Transgelin-2                                       | 22.39         | 123040000 | 277630000 | 2.26           | 54    | 80     |
| Q06830                             | PRDX1   | Peroxiredoxin-1                                    | 22.11         | 112050000 | 238990000 | 2.13           | 33    | 55     |
| P04040                             | CATA    | Catalase                                           | 59.76         | 46377000  | 197220000 | 4.25           | 35    | 67     |
| P10599                             | THIO    | Thioredoxin                                        | 11.74         | 67884000  | 180200000 | 2.65           | 24    | 37     |
| P40926                             | MDHM    | Malate dehydrogenase, mitochondrial                | 35.50         | 87967000  | 179350000 | 2.04           | 56    | 59     |
| Q15084                             | PDIA6   | Protein disulfide-isomerase A6                     | 48.12         | 29999000  | 71084000  | 2.37           | 24    | 30     |
| Q9HB71                             | CYBP    | Calcyclin-binding protein                          | 26.21         | 28564000  | 58067000  | 2.03           | 21    | 22     |
| P61769                             | B2MG    | Beta-2-microglobulin                               | 13.71         | 21218000  | 54376000  | 2.56           | 11    | 19     |
| P84090                             | ERH     | Enhancer of rudimentary homolog                    | 12.26         | 20356000  | 53987000  | 2.65           | 14    | 19     |
| P62314                             | SMD1    | Small nuclear ribonucleoprotein Sm D1              | 13.28         | 22721000  | 52950000  | 2.33           | 12    | 10     |
| Q15181                             | IPYR    | Inorganic pyrophosphatase                          | 32.66         | 20097000  | 50126000  | 2.49           | 26    | 24     |
| P61981                             | 1433G   | 14-3-3 protein gamma                               | 28.30         | 20896000  | 49693000  | 2.38           |       | 15     |
| P62993                             | GRB2    | Growth factor receptor-bound protein 2             | 25.21         | 18530000  | 41578000  | 2.24           | 20    | 24     |
| Q8NBS9                             | TXND5   | Thioredoxin domain-containing protein 5            | 47.63         | 6146400   | 36801000  | 5.99           | 10    | 17     |
| P14174                             | MIF     | Macrophage migration inhibitory factor             | 12.48         | 17414000  | 35634000  | 2.05           | 9     | 11     |
| P35613                             | BASI    | Basigin                                            | 42.20         | 11808000  | 31137000  | 2.64           | 18    | 14     |
| Q9UKK9                             | NUDT5   | ADP-sugar pyrophosphatase                          | 24.33         | 12383000  | 31023000  | 2.51           | 24    | 27     |
| P26196                             | DDX6    | Probable ATP-dependent RNA helicase DDX6           | 54.42         | 11634000  | 26915000  | 2.31           | 12    | 14     |
| P18206                             | VINC    | Vinculin                                           | 123.80        | 8436500   | 22422000  | 2.66           | 13    | 37     |
| Q96C19                             | EFHD2   | EF-hand domain-containing protein D2               | 26.70         | 9466200   | 21110000  | 2.23           | 17    | 19     |
| Q6IBS0                             | TWF2    | Twinfilin-2                                        | 39.55         | 4944200   | 20196000  | 4.08           | 11    | 18     |
| Q5JPE7                             | NOMO2   | Nodal modulator 2                                  | 139.44        | 9107900   | 19589000  | 2.15           | 14    | 29     |
| P06396                             | GELS    | Gelsolin                                           | 85.70         | 6661300   | 16368000  | 2.46           | 9     | 25     |
| P42126                             | ECI1    | Enoyl-CoA delta isomerase 1, mitochondrial         | 32.82         | 6636600   | 14741000  | 2.22           | 11    | 12     |
| Q9HB07                             | MYG1    | UPF0160 protein MYG1, mitochondrial                | 42.45         | 6042400   | 12421000  | 2.06           | 10    | 11     |
| P16930                             | FAAA    | Fumarylacetoacetase                                | 46.37         | 4823200   | 12266000  | 2.54           | 4     | 16     |
| P55263                             | ADK     | Adenosine kinase                                   | 40.55         | 5748100   | 11616000  | 2.02           | 5     | 15     |
| P83731                             | RL24    | 60S ribosomal protein L24                          | 17.78         | 3740400   | 8818000   | 2.36           | 7     | 10     |
| Q9NX46                             | ARHL2   | Poly(ADP-ribose) glycohydrolase ARH3               | 38.95         | 1934600   | 8449500   | 4.37           | 7     | 10     |
| Q9NTZ6                             | RBM12   | RNA-binding protein 12                             | 97.39         | 3447300   | 8126500   | 2.36           | 4     | 16     |
| P06132                             | DCUP    | Uroporphyrinogen decarboxylase                     | 40.79         | 2945300   | 7651900   | 2.60           | 5     | 11     |
| O75368                             | SH3L1   | SH3 domain-binding glutamic acid-rich-like protein | 12.77         | 2110700   | 7528700   | 3.57           | 3     | 12     |
| P28676                             | GRAN    | Grancalcin                                         | 24.01         | 795040    | 4944700   | 6.22           | 3     | 10     |
| Q13685                             | AAMP    | Angio-associated migratory cell protein            | 46.75         | 1990800   | 4569100   | 2.30           | 9     | 13     |
| Q9NZL9                             | MAT2B   | Methionine adenosyltransferase 2 subunit beta      | 37.55         | 772300    | 4341300   | 5.62           | 2     | 10     |
| P31151                             | S10A7   | Protein S100-A7                                    | 11.47         | 0         | 3937600   | S-250+ only    | 0     | 10     |
| P42566                             | EPS15   | Epidermal growth factor receptor substrate 15      | 98.66         | 862900    | 1862500   | 2.16           | 2     | 11     |

**Supplementary Table 3: Summary of results from screening enzymes**

| <b>Enzyme</b> | <b>S-250 inhibition at dose upto 10<math>\mu</math>M</b> |
|---------------|----------------------------------------------------------|
| MDH1          | No                                                       |
| MDH2          | No                                                       |
| LDHA          | No                                                       |
| GAPDH         | No                                                       |
| GR            | No                                                       |
| GPX           | No                                                       |
| PDIA1/6       | No                                                       |
| TrxR1         | Yes                                                      |

**Supplementary Table 4: Summary of results from CEREP safetyscreen-44**

| Assay name                                             | Species | Repeats | Concentration | % Inhibition |
|--------------------------------------------------------|---------|---------|---------------|--------------|
| Cholinesterase, Acetyl, ACES                           | Human   | 2       | 10 $\mu$ M    | 0            |
| Cyclooxygenase COX-1                                   | Human   | 2       | 10 $\mu$ M    | 2            |
| Cyclooxygenase COX-2                                   | Human   | 2       | 10 $\mu$ M    | -17          |
| Monoamine Oxidase MAO-A                                | Human   | 2       | 10 $\mu$ M    | 3            |
| Phosphodiesterase PDE3A                                | Human   | 2       | 10 $\mu$ M    | 0            |
| Phosphodiesterase PDE4D2                               | Human   | 2       | 10 $\mu$ M    | 16           |
| Protein Tyrosine Kinase, LCK                           | Human   | 2       | 10 $\mu$ M    | -17          |
| Adenosine A2A                                          | Human   | 2       | 10 $\mu$ M    | 4            |
| Adrenergic $\alpha$ 1A                                 | Rat     | 2       | 10 $\mu$ M    | 24           |
| Adrenergic $\alpha$ 2A                                 | Human   | 2       | 10 $\mu$ M    | 35           |
| Adrenergic $\beta$ 1                                   | Human   | 2       | 10 $\mu$ M    | 5            |
| Adrenergic $\beta$ 2                                   | Human   | 2       | 10 $\mu$ M    | -6           |
| Androgen (Testosterone)                                | Human   | 2       | 10 $\mu$ M    | 53           |
| Calcium Channel L-Type,                                | Rat     | 2       | 10 $\mu$ M    | 10           |
| Cannabinoid CB1                                        | Human   | 2       | 10 $\mu$ M    | 13           |
| Cannabinoid CB2                                        | Human   | 2       | 10 $\mu$ M    | -12          |
| Dopamine D1                                            | Human   | 2       | 10 $\mu$ M    | 14           |
| Dopamine D2S                                           | Human   | 2       | 10 $\mu$ M    | 16           |
| Endothelin ETA                                         | Human   | 2       | 10 $\mu$ M    | -3           |
| GABAA, Flunitrazepam, Central                          | Rat     | 2       | 10 $\mu$ M    | 14           |
| Glucocorticoid                                         | Human   | 2       | 10 $\mu$ M    | 94           |
| Glutamate, NMDA, Agonism                               | Rat     | 2       | 10 $\mu$ M    | -10          |
| Histamine H1                                           | Human   | 2       | 10 $\mu$ M    | 47           |
| Histamine H2                                           | Human   | 2       | 10 $\mu$ M    | 31           |
| Muscarinic M1                                          | Human   | 2       | 10 $\mu$ M    | 3            |
| Muscarinic M2                                          | Human   | 2       | 10 $\mu$ M    | 1            |
| Muscarinic M3                                          | Human   | 2       | 10 $\mu$ M    | -3           |
| Nicotinic Acetylcholine $\alpha$ 4 $\beta$ 2, Cytisine | Human   | 2       | 10 $\mu$ M    | 1            |
| Opiate $\delta$ 1 (OP1, DOP)                           | Human   | 2       | 10 $\mu$ M    | -3           |
| Opiate $\kappa$ (OP2, KOP)                             | Human   | 2       | 10 $\mu$ M    | 30           |
| Opiate $\mu$ (OP3, MOP)                                | Human   | 2       | 10 $\mu$ M    | 17           |
| Potassium Channel [KA]                                 | Rat     | 2       | 10 $\mu$ M    | -3           |
| Potassium Channel hERG, [3H]Dofetilide                 | Human   | 2       | 10 $\mu$ M    | 28           |
| Serotonin (5-Hydroxytryptamine) 5-                     | Human   | 2       | 10 $\mu$ M    | 9            |
| Serotonin (5-Hydroxytryptamine) 5-                     | Human   | 2       | 10 $\mu$ M    | -5           |
| Serotonin (5-Hydroxytryptamine) 5-                     | Human   | 2       | 10 $\mu$ M    | 14           |
| Serotonin (5-Hydroxytryptamine) 5-                     | Human   | 2       | 10 $\mu$ M    | 5            |
| Transporter, Dopamine (DAT)                            | Human   | 2       | 10 $\mu$ M    | -10          |
| Transporter, Norepinephrine (NET)                      | Human   | 2       | 10 $\mu$ M    | 8            |
| Vasopressin V1A                                        | Human   | 2       | 10 $\mu$ M    | -24          |

**Supplementary Table 5: Mouse Complete Blood Counts**

|                 | <b>Vehicle (Day 0)</b> | <b>Vehicle (Day 14)</b> | <b><sup>a</sup>S-250 (Day 0)</b> | <b><sup>a</sup>S-250 (Day 14)</b> | <b>Normal range</b> |
|-----------------|------------------------|-------------------------|----------------------------------|-----------------------------------|---------------------|
| WBC (K/uL)      | 10.14 ± 0.91           | 5.41 ± 1.27             | 9.81 ± 0.64                      | 5.48 ± 1.01                       | 1.8-10.7            |
| RBC (M/uL)      | 10.0 ± 0.10            | 9.67 ± 0.07             | 10.16 ± 0.04                     | 8.98 ± 0.39                       | 6.36-9.42           |
| Hb (g/dL)       | 15.7 ± 0.3             | 14.83 ± 0.08            | 15.73 ± 0.41                     | 13.83 ± 0.52                      | 11.0-15.1           |
| Platelet (K/uL) | 706.66 ± 61.79         | 707 ± 93.29             | 621 ± 55.29                      | 635.33 ± 45.72                    | 592-2972            |

<sup>a</sup>S-250 was injected at 12.5mg/kg intraperitoneally twice a day, thrice a week for two weeks and blood was tested on day 14.
